# Supplementary material for: Electrocorticographic changes in field potentials following natural somatosensory percepts in humans
Source: Springer Nature journal article supplement (doi:10.1007/s00221-019-05495-1), 2019-02-22
Supplement: MOESM1 [file 221_2019_5495_MOESM1_ESM.pdf]

# **Electrocorticographic changes in field potentials following natural somatosensory percepts in humans**

Experimental Brain Research

Daniel R. Kramer MD<sup>1,4,5</sup>

Michael F. Barbaro BS<sup>1</sup>

Morgan Lee BS<sup>1</sup>

Terrance Peng BS, MPH<sup>1</sup>

George Nune MD<sup>2,5</sup>

Charles Y. Liu MD PhD<sup>1,3,4,5</sup>

Spencer Kellis<sup>1,3,4,5</sup>

Brian Lee MD PhD<sup>1,3,4,5</sup>

<sup>1</sup>Department of Neurosurgery, University of Southern California, Los Angeles, California, USA

<sup>2</sup>Department of Neurology, University of Southern California, Los Angeles, California, USA

<sup>3</sup>Department of Biology and Biological Engineering, California Institute of Technology, Pasadena, California, USA

<sup>4</sup>Tianqiao and Chrissy Chen Brain-machine Interface Center, California Institute of Technology, Pasadena, California, USA

<sup>5</sup>University of Southern California, Neurorestoration Center, Los Angeles, California, USA

Corresponding Author:

Daniel R. Kramer, M.D.

1200 N. State Street, Suite 3300

Los Angeles, CA 90033

drk\_431@usc.edu

Office: (323) 226-2271

Fax: (323) 226-7833
